# Supplementary material for: Immune responses to mRNA vaccines against SARS-CoV-2 in patients with immune-mediated inflammatory rheumatic diseases
Source: HighWire-hosted journal article supplement (doi:10.1136/rmdopen-2021-001898), 2022-01-01
Supplement: rmdopen-2021-001898supp002_data_supplement.pdf [file rmdopen-2021-001898supp002_data_supplement.pdf]

**Supplementary material 1.****Vaccine immunogenicity according to brand.**

| <b>Vaccine brand</b>  | <b>BNT162b2</b> | <b>mRNA -1273</b> | <b>p value</b> |
|-----------------------|-----------------|-------------------|----------------|
| <b>Cohort 1</b>       | N= 52           | N= 48             |                |
| Seroconversion        | 28 (53%)        | 27 (56%)          | 0.72           |
| IgG anti-spike levels | 210±290         | 220±320           | 0.65           |
| CD4 T-cell response   | 25 (48%)        | 27 (56%)          | 0.28           |
| CD8 T-cell response   | 26 (50%)        | 27 (56%)          | 0.38           |
| <b>Cohort 2</b>       | N= 32           | N=18              |                |
| Seroconversion        | 23 (72%)        | 15 (83%)          | 0.37           |
| IgG anti-spike levels | 425±2320        | 460±2830          | 0.67           |
| CD4 T-cell response   | 23 (72%)        | 12 (80%)          | 0.70           |
| CD8 T-cell response   | 23 (72%)        | 13 (87%)          | 0.28           |
| <b>Cohort 3</b>       | N=29            | N=21              |                |
| Seroconversion        | 27 (100%)       | 23 (100%)         |                |
| IgG anti-spike levels | 512± 2123       | 584±1997          | 0.68           |
| CD4 T-cell response   | 29 (100%)       | 21 (100%)         |                |
| CD8 T-cell response   | 26 (89%)        | 20 (95%)          | 0.76           |
