# Supplementary material for: Immune responses to mRNA vaccines against SARS-CoV-2 in patients with immune-mediated inflammatory rheumatic diseases
Source: HighWire-hosted journal article supplement (doi:10.1136/rmdopen-2021-001898), 2022-01-01
Supplement: rmdopen-2021-001898supp004_data_supplement.pdf [file rmdopen-2021-001898supp004_data_supplement.pdf]

## Supplementary material 4

Table: Quantitative *in vitro* CD4 and CD8 responses in vaccinated populations under different treatment modalities.

|                                       | Cohort 3<br>(no ISP, n=50) |                | Methotrexate<br>n=21 |                | Rituximab<br>n=16 |                | Belimumab<br>n=8 |                | Abatacept<br>n=10 |                | Mycophenolate<br>n=10 |                | Azathioprine<br>n=7 |                |
|---------------------------------------|----------------------------|----------------|----------------------|----------------|-------------------|----------------|------------------|----------------|-------------------|----------------|-----------------------|----------------|---------------------|----------------|
|                                       | <i>Basal</i>               | <i>Peptide</i> | <i>Basal</i>         | <i>Peptide</i> | <i>Basal</i>      | <i>Peptide</i> | <i>Basal</i>     | <i>Peptide</i> | <i>Basal</i>      | <i>Peptide</i> | <i>Basal</i>          | <i>Peptide</i> | <i>Basal</i>        | <i>Peptide</i> |
| <b>Interleukin 2</b>                  | 5<br>(9)                   | 86<br>(90)     | 6<br>(5)             | 69<br>(78)     | 4<br>(5)          | 46<br>(91)     | 5<br>(8)         | 71<br>(66)     | 4<br>(5)          | 9<br>(12)      | 6<br>(5)              | 54<br>(81)     | 4<br>(5)            | 38<br>(54)     |
| <b>Interferon <math>\gamma</math></b> | 4<br>(5)                   | 192<br>(270)   | 3<br>(8)             | 158<br>(201)   | 6<br>(10)         | 99<br>(89)     | 5<br>(5)         | 118<br>(69)    | 3<br>(6)          | 10<br>(16)     | 5<br>(9)              | 123<br>(117)   | 3<br>(7)            | 84<br>(88)     |
| <b>Granzyme A</b>                     | 19<br>(18)                 | 97<br>(103)    | 11<br>(10)           | 71<br>(77)     | 16<br>(12)        | 48<br>(42)     | 21<br>(18)       | 60<br>(82)     | 15<br>(17)        | 29<br>(34)     | 13<br>(9)             | 68<br>(56)     | 18<br>(20)          | 39<br>(56)     |
| <b>Granzyme B</b>                     | 25<br>(29)                 | 234<br>(343)   | 21<br>(16)           | 159<br>(278)   | 26<br>(18)        | 97<br>(123)    | 16<br>(19)       | 146<br>(107)   | 18<br>(17)        | 25<br>(19)     | 21<br>(14)            | 142<br>(187)   | 14<br>(9)           | 37<br>(61)     |

3 x 10<sup>6</sup> lymphocytes were cultured with (*peptide*) or without (*basal*) a pool of S-peptides plus anti-CD28 for 18 hours. Interleukin 2, Interferon  $\gamma$  (CD4 Th1 surrogate), Granzyme A and Granzyme B (CD8 surrogate) were quantified in supernatants. As described in material and methods, values increased at least 2x above individual's basal values were considered positive. Results are median pg/ml and interquartile range (IQR). ISP: immunosuppression.
